# Supplementary material for: Quantum harmonic free energies for biomolecules and nanomaterials
Source: Research Square preprint supplement (doi:10.21203/rs.3.rs-1132772/v1), 2022-01-06
Supplement: Supplementary file 1 [file pseudocode.pdf › stochastic_thermo_repo/pseudocode.pdf]

**Input:** system coordinates  $\mathbf{X} \in \mathbb{R}^{3N}$ , the function for computing a thermodynamic property  $f$ , Lanczos order  $m$ , number of samples  $n$ , finite displacement  $\delta$

**Output:** The approximate trace of  $f(\mathbf{D}(\mathbf{X}))$  where  $\mathbf{D}$  is the mass-weighted Hessian matrix.

**Algorithm:**

$\Gamma \leftarrow 0$

**for**  $l = 1$  to  $n$  **do**

1. Generate a Rademacher random vector  $\mathbf{v}_l$  with unit norm.

2. Apply  $m + 1$  steps of Lanczos to the Hessian using  $\mathbf{v}_l$  as the starting vector:  $\mathbf{T} = \text{Lanczos}(\mathbf{D}(\mathbf{X}), \mathbf{v}_l, m + 1)$ , in which the matrix-vector multiplication involved is realized as

$\mathbf{D}\mathbf{x} = \mathbf{M}^{-\frac{1}{2}} \frac{\mathbf{g}(\mathbf{X} + \delta\mathbf{x}) - \mathbf{g}(\mathbf{X} - \delta\mathbf{x})}{2\delta}$  where  $\mathbf{g}$  is the nuclear gradient.

3.  $\mathbf{Y}, \boldsymbol{\Theta} = \text{eig}(\mathbf{T})$  where  $\mathbf{y}_k$  and  $\theta_k$  are the  $k$ -th eigenvector and eigenvalue of  $\mathbf{T}$

4.  $\tau_k \leftarrow$  the first entry of  $\mathbf{y}_k$

5.  $\Gamma \leftarrow \Gamma + \sum_{k=0}^m \tau_k^2 f(\theta_k)$

**end for**

Output  $\Gamma = \frac{3N}{n} \Gamma$
